# Supplementary material
Source: publisher figshare collection journal article supplement (https://frontiersin.figshare.com/ndownloader/files/13327358)

**Figure S1** The length distribution of the small RNA in four miRNA libraries.

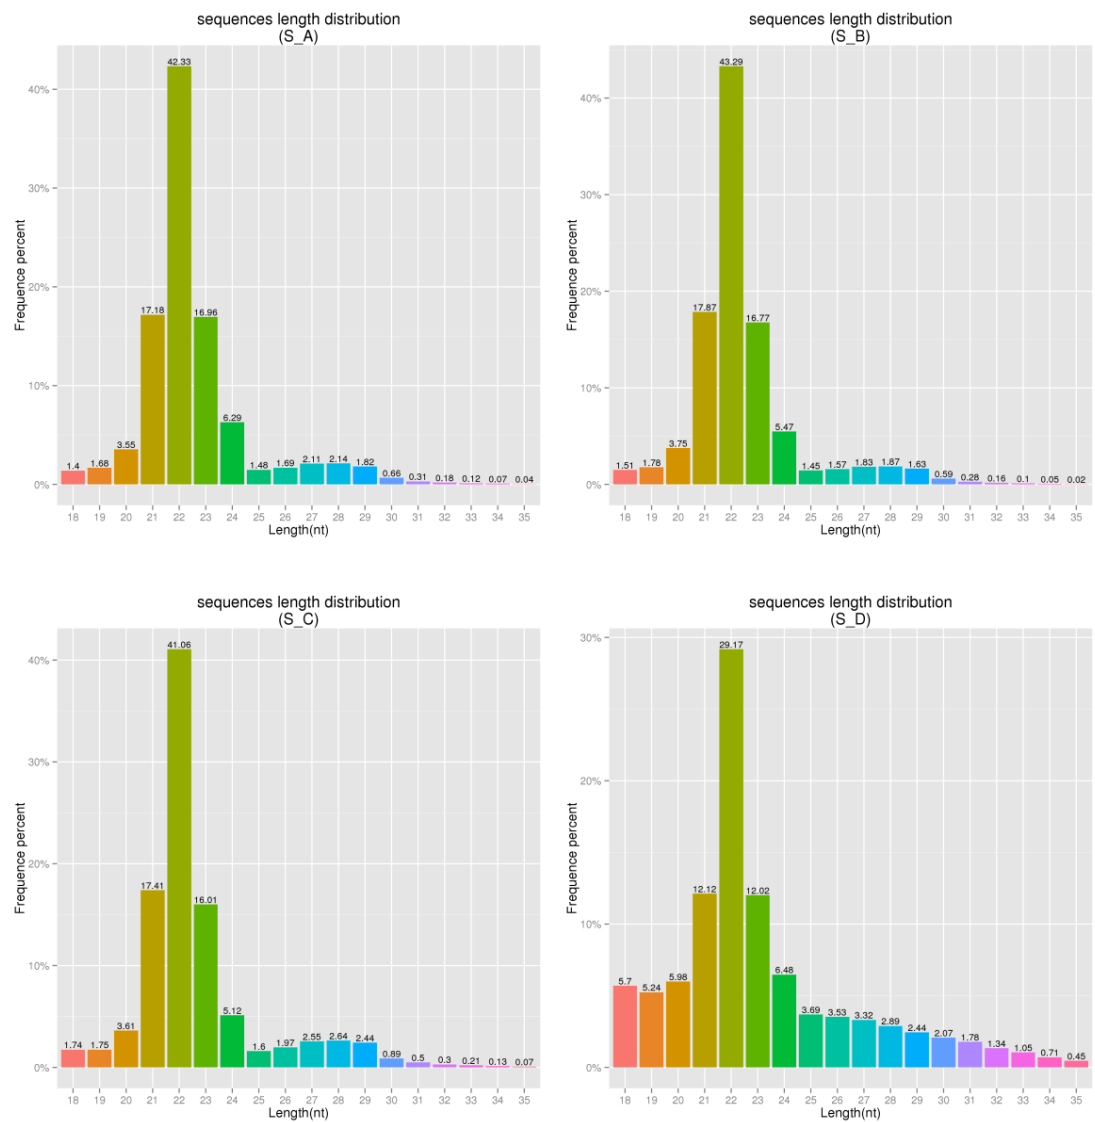

**Figure S2** The distribution of reads on chromosomes.

**S\_A**

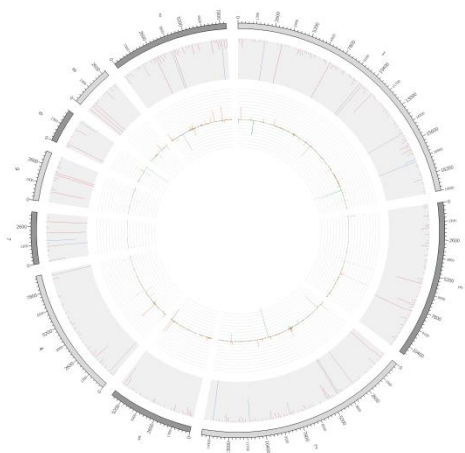

**S\_B**

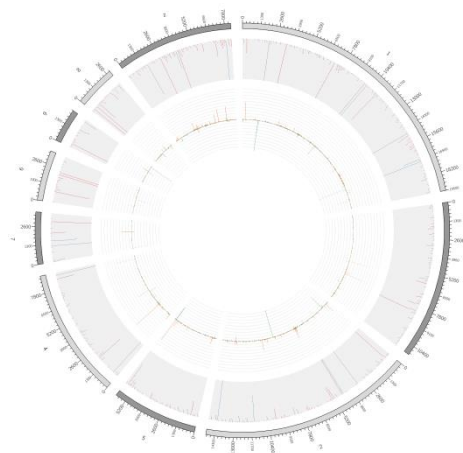

**S\_C**

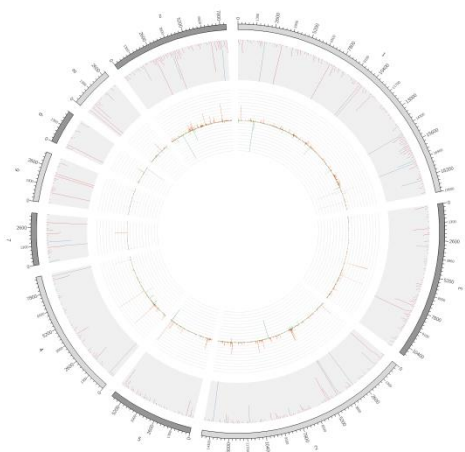

**S\_D**

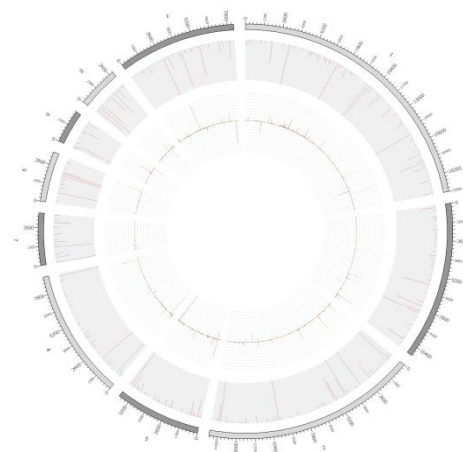

**Figure S3** The volcano maps of differently expressed miRNAs.

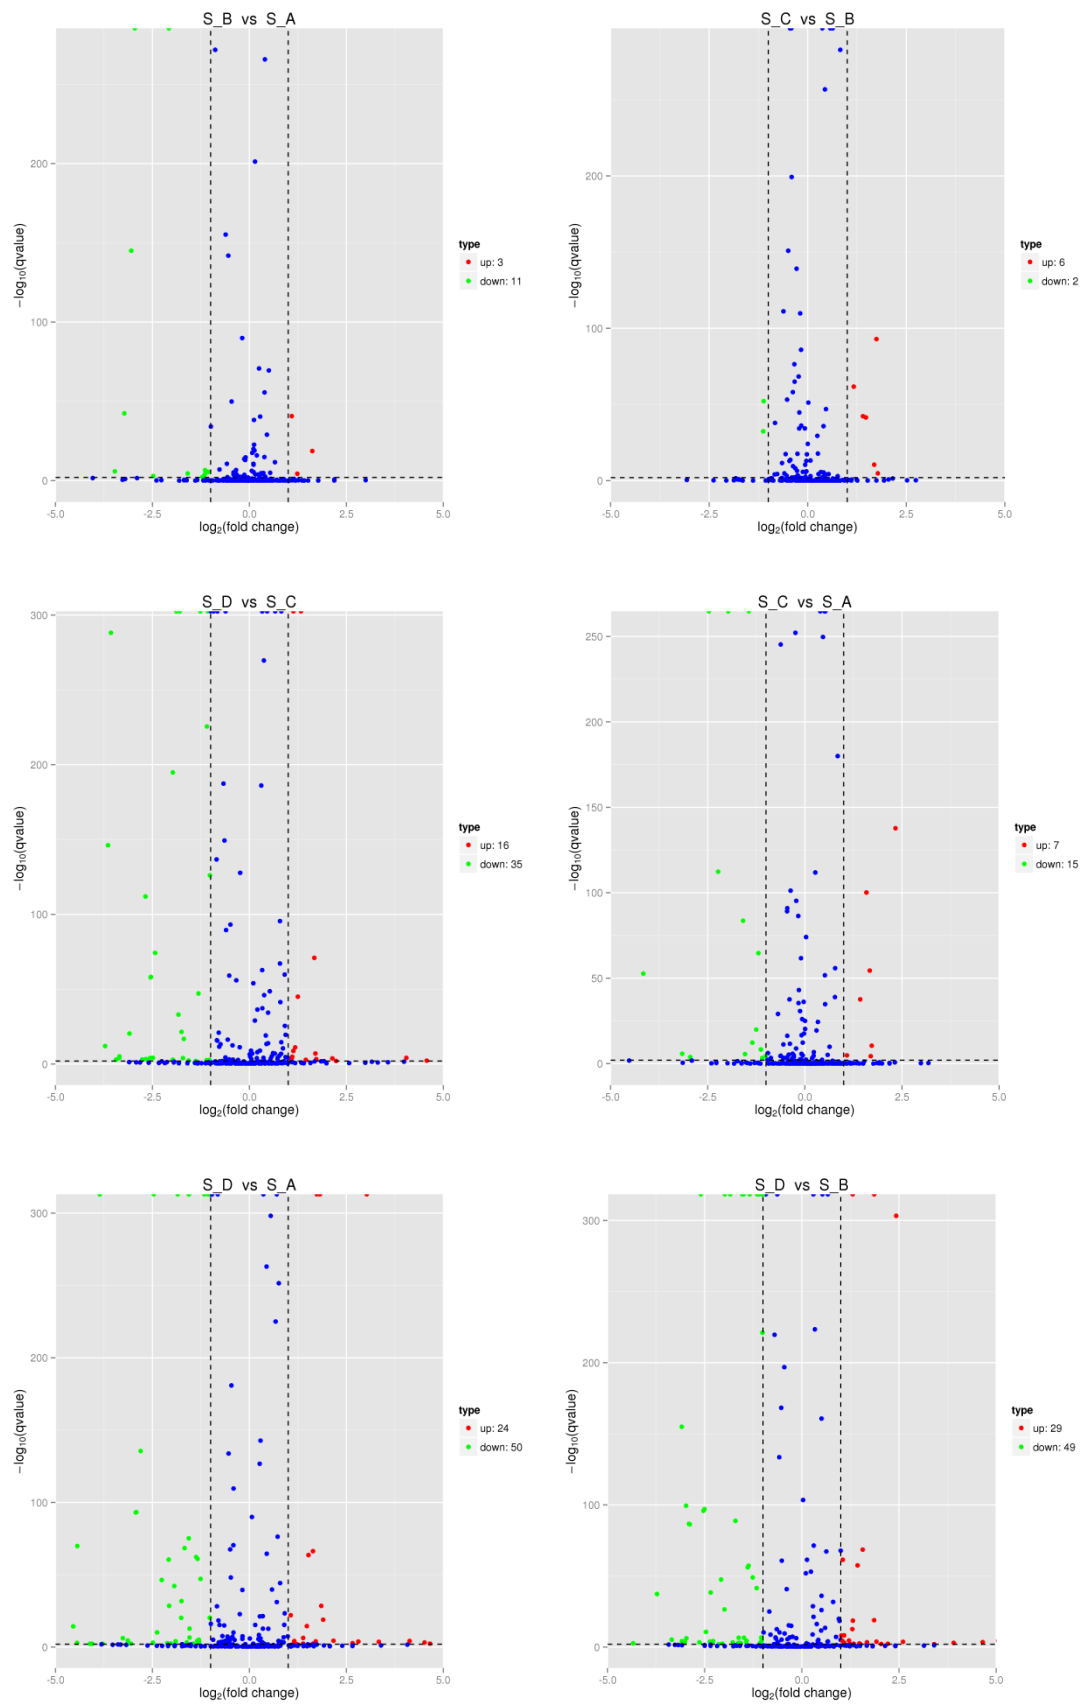

**Figure S4** The reads distribution of four cDNA libraries.

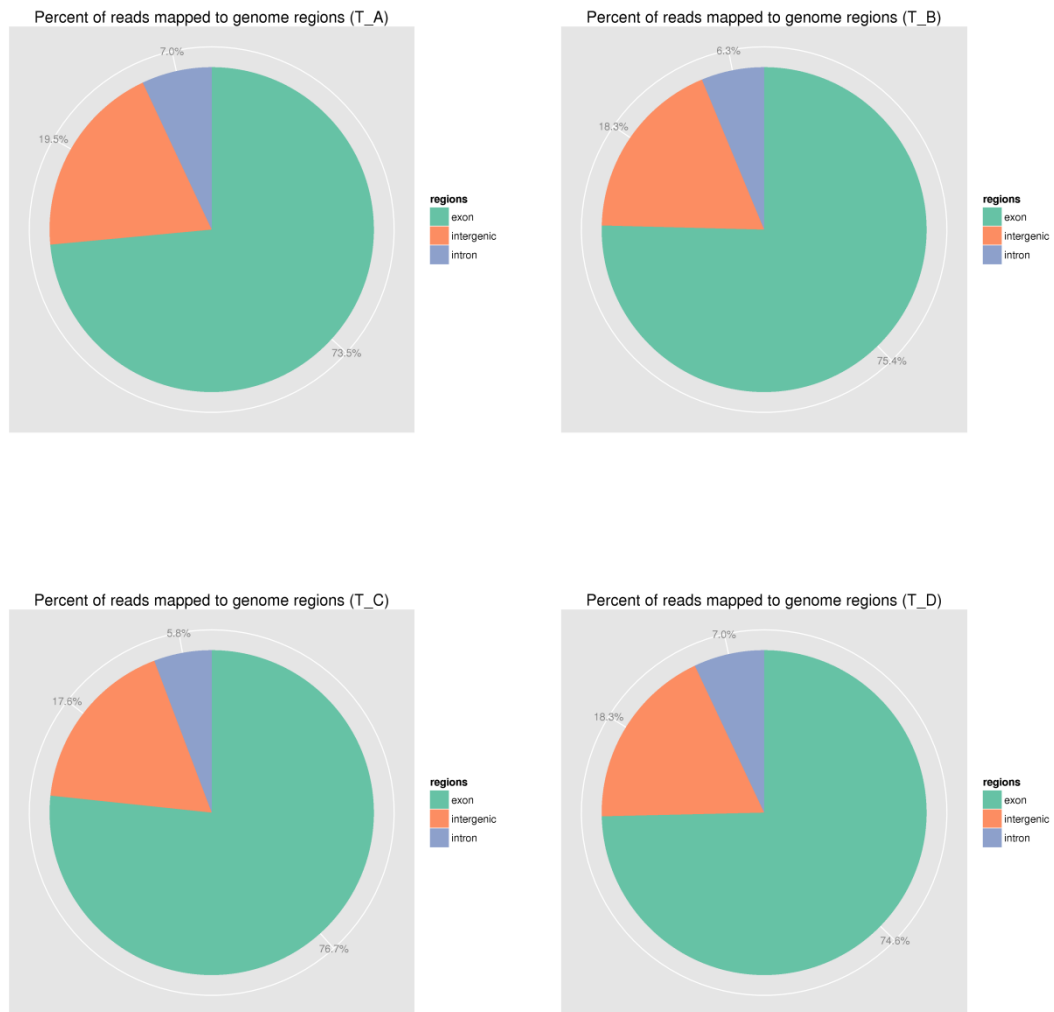

**Figure S5** The volcano maps of differently expressed mRNAs.

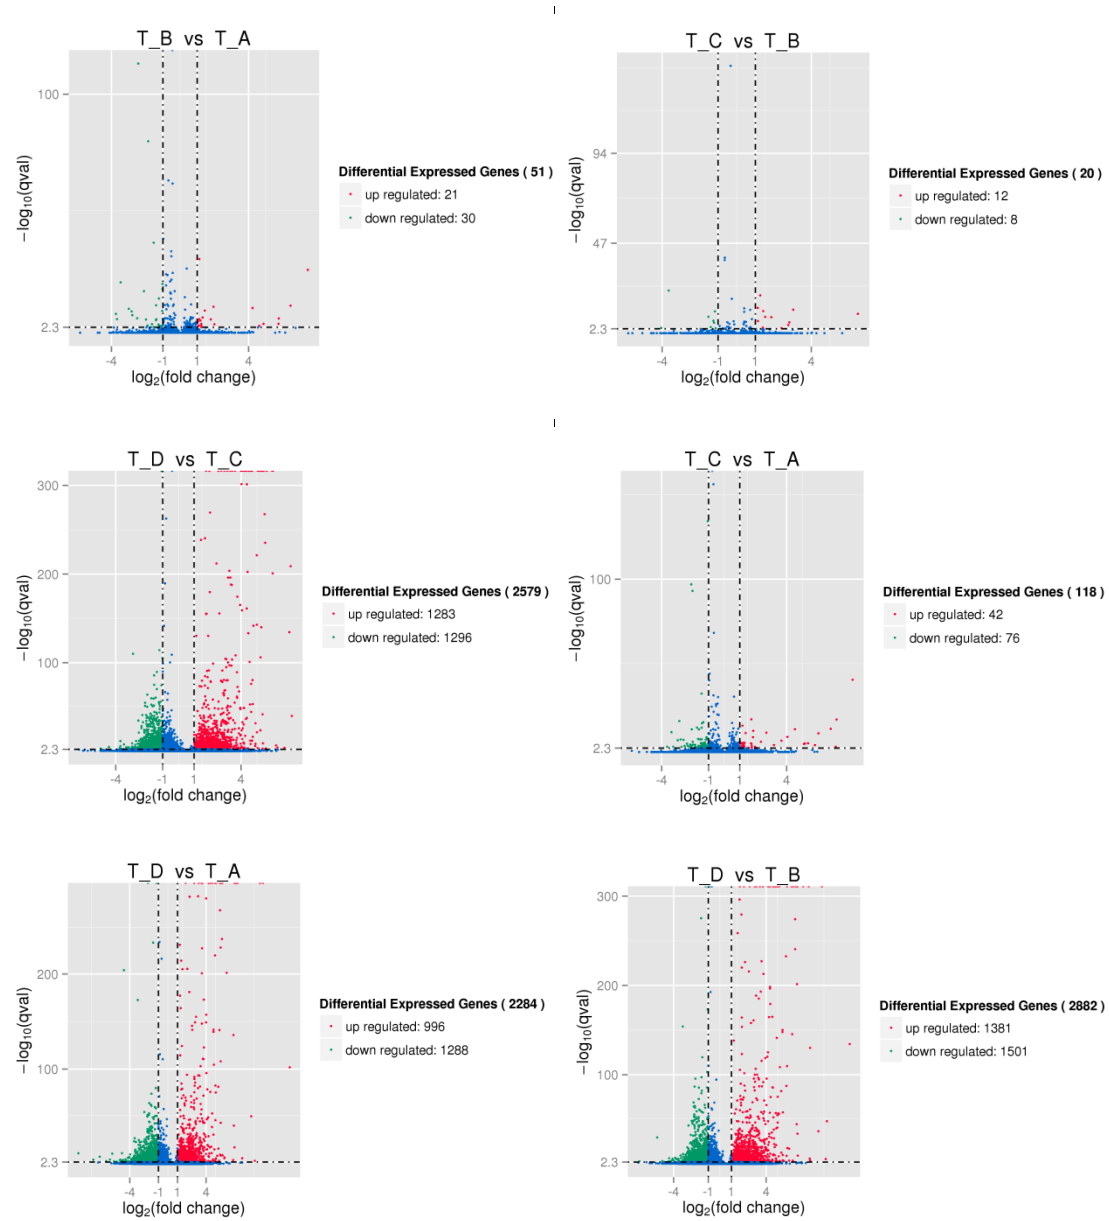

**Figure S6** The details of RNA quality determined using an Agilent 2100 Bioanalyzer.

S\_A

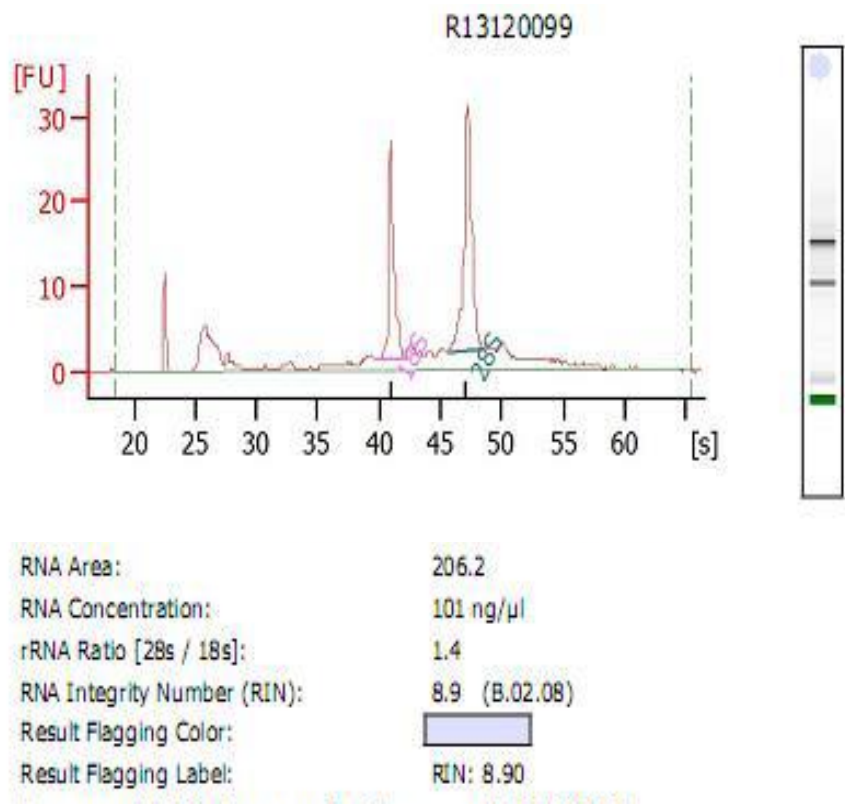

S\_B

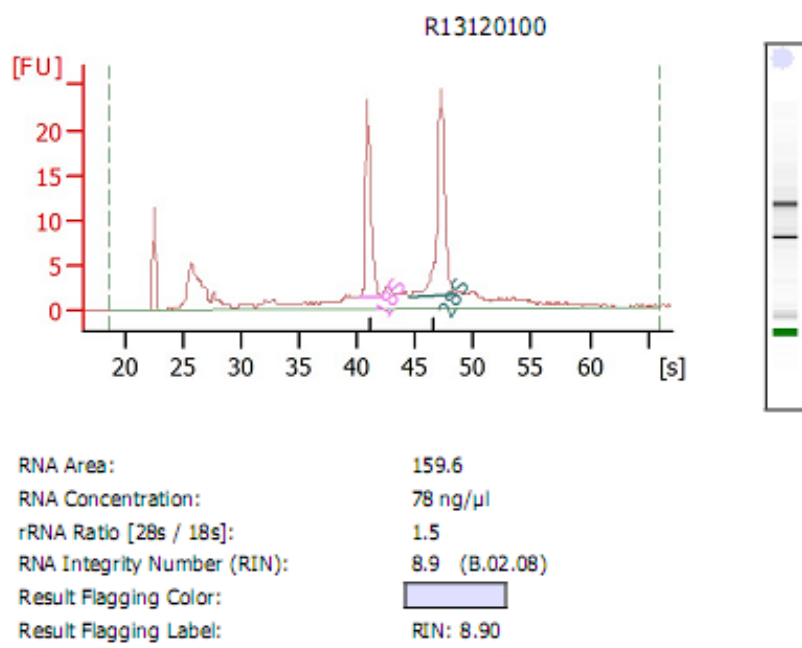

S\_C

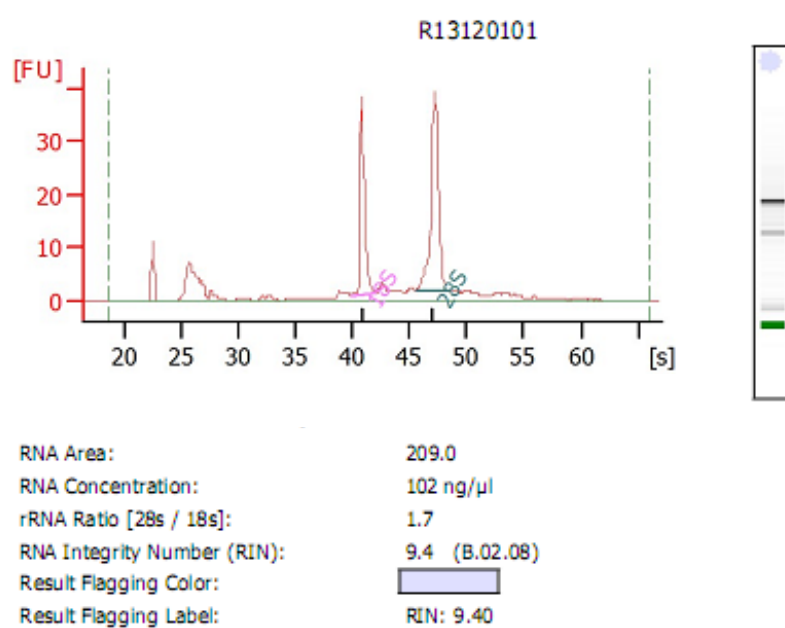

S\_D

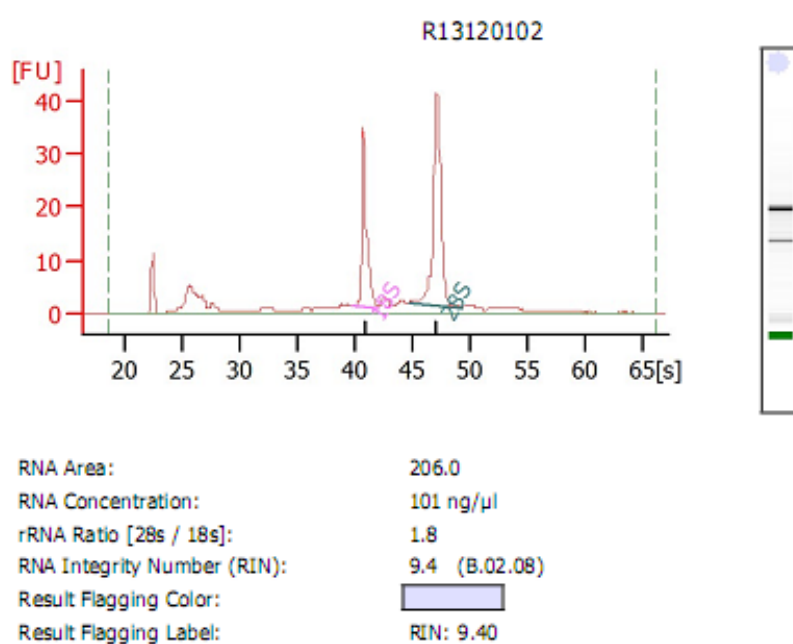

**Figure S7** The quality of RNA samples detected by 1% agarose gel electrophoresis.

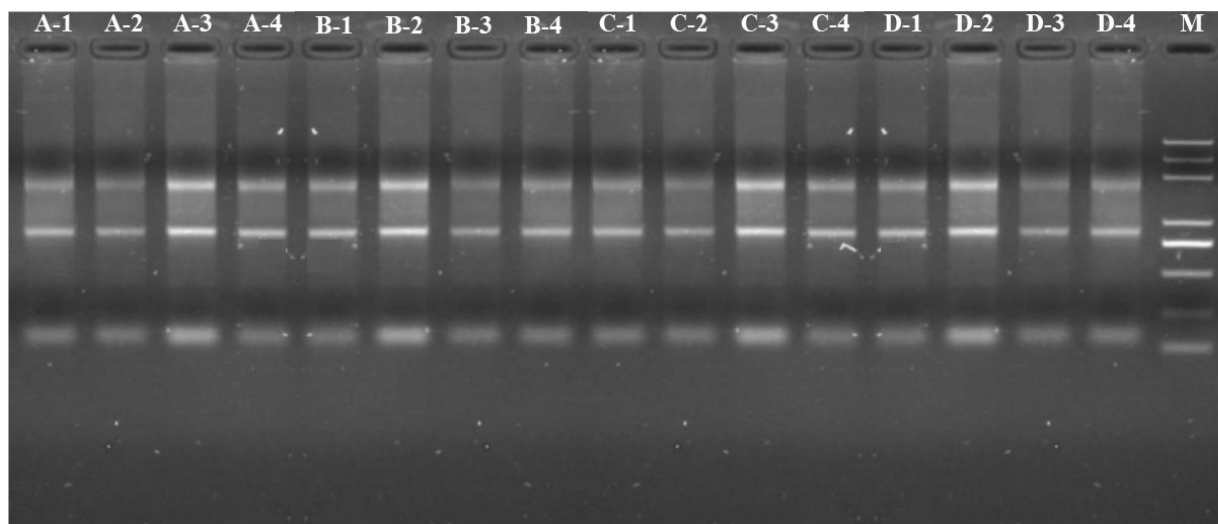

Supplement: Supplementary file [file 13327358]
